RESEARCH ARTICLE

# Improved usability of a multi-infusion setup using a centralized control interface: A task-based usability test

Frank Doesburg<sup>1\*</sup>, Fokje Cnossen<sup>2</sup>, Willem Dieperink<sup>1</sup>, Wouter Bult<sup>1,3</sup>, Anne Marie de Smet<sup>1</sup>, Daan J. Touw<sup>3,4</sup>, Maarten W. Nijsten<sup>1</sup>

**1** University of Groningen, University Medical Center Groningen, Department of Critical Care, Groningen, The Netherlands, **2** University of Groningen, Institute of Artificial Intelligence and Cognitive Engineering, Groningen, The Netherlands, **3** University of Groningen, University Medical Center Groningen, Department of Clinical Pharmacy and Pharmacology, Groningen, The Netherlands, **4** University of Groningen, University Medical Center Groningen, Department of Pharmacokinetics, Toxicology and Targeting, Groningen, The Netherlands

\* [f.doesburg@umcg.nl](mailto:f.doesburg@umcg.nl)

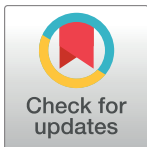

**OPEN ACCESS**

**Citation:** Doesburg F, Cnossen F, Dieperink W, Bult W, de Smet AM, Touw DJ, et al. (2017) Improved usability of a multi-infusion setup using a centralized control interface: A task-based usability test. PLoS ONE 12(8): e0183104. <https://doi.org/10.1371/journal.pone.0183104>

**Editor:** Roland A. Snijder, University Medical Center Utrecht, NETHERLANDS

**Received:** April 25, 2017

**Accepted:** July 27, 2017

**Published:** August 11, 2017

**Copyright:** © 2017 Doesburg et al. This is an open access article distributed under the terms of the [Creative Commons Attribution License](https://creativecommons.org/licenses/by/4.0/), which permits unrestricted use, distribution, and reproduction in any medium, provided the original author and source are credited.

**Data Availability Statement:** All relevant data are within the paper and its Supporting Information files.

**Funding:** The research presented in this paper was made possible thanks to a UMCG Healthy Ageing Pilot grant filed under CD014.0031 nr 195. The funders had no role in study design, data collection and analysis, decision to publish, or preparation of the manuscript.

**Competing interests:** The authors have declared that no competing interests exist.

## Abstract

The objective of this study was to assess the usability benefits of adding a bedside central control interface that controls all intravenous (IV) infusion pumps compared to the conventional individual control of multiple infusion pumps. Eighteen dedicated ICU nurses volunteered in a between-subjects task-based usability test. A newly developed central control interface was compared to conventional control of multiple infusion pumps in a simulated ICU setting. Task execution time, clicks, errors and questionnaire responses were evaluated. Overall the central control interface outperformed the conventional control in terms of fewer user actions ( $40 \pm 3$  vs.  $73 \pm 20$  clicks,  $p < 0.001$ ) and fewer user errors ( $1 \pm 1$  vs.  $3 \pm 2$  errors,  $p < 0.05$ ), with no difference in task execution times ( $421 \pm 108$  vs.  $406 \pm 119$  seconds, not significant). Questionnaires indicated a significant preference for the central control interface. Despite being novice users of the central control interface, ICU nurses displayed improved performance with the central control interface compared to the conventional interface they were familiar with. We conclude that the new user interface has an overall better usability than the conventional interface.

## Introduction

In the last decades human factors research has been acknowledged as crucial in the development of high risk medical equipment [1–3]. Infusion pumps are among the most frequently used medical devices, and are used for the controlled intravenous (IV) administration of many infusion fluids and drug solutions. Erroneous use of infusion pumps may lead to (temporary) under- or overdosing of vital drugs, with potentially severe consequences. The usability of infusion pumps has often been identified as an important contributor to the incidence of such medication errors [4–8]. Various studies using heuristic analysis have already pointed to

various design flaws in pumps [7,9,10]. Factors such as inadequate training, workflow interruptions or high workload can further increase the likelihood of such errors [7,11,12]. In some studies where new user interfaces were designed and tested, the focus was on the usability of individual pumps [13–15]. However, this is a situation not representative of a critical care setting where patients are often treated with over six pumps simultaneously. Also, medication errors are more frequent in the critical care arena than in any other hospital department, while patients who are most severely ill may be even more vulnerable to such errors [11,16–19]. Hence, in the current proof of concept study we focused on the IV delivery system as a whole instead of focusing on individual pumps.

We designed a new user interface for the centralized monitoring and control of multiple infusion pumps by ICU nurses (S1 Fig). Actions that would normally be performed directly on the infusion pump's user interface, such as changing an infusion rate, can now be performed on a new central bedside user interface. The central user interface forwards the appropriate commands to each individual pump under its control. We hypothesized that such a more user-friendly interface would reduce the risk of user errors and would also improve the workflow and user satisfaction compared to the conventional control of multiple infusion pumps. The objective of this study was to develop and evaluate the possible usability benefits of a bedside central control interface for multiple infusion pumps compared to conventional multi-pump operation. For this purpose we followed the ISO 9241–11 definition of usability: "The extent to which a product can be used by specified users to achieve specified goals with effectiveness, efficiency and satisfaction in a specified context of use" [20].

## Materials and methods

### Hardware and connectivity

The availability of a relatively large touch screen (Samsung SM-T900; 12.2 inch screen diagonal) and the availability of a USB host mode were decisive in choosing the Android platform. The USB-serial-for-Android library, licensed under GNU Lesser General Public License (LGPL) Version 2.1, was used to facilitate serial communication between the Android tablet and the infusion pumps [21]. Three Alaris Asena GH Syringe pumps (Carefusion, United Kingdom) with firmware v2.3.6 were used. Physical connectivity was achieved using a Startech UUSBOTG micro-USB to USB OTG cable, a generic 4-port USB hub and three Startech ICUSB2321F USB-to-serial converters. Pump communication followed the Alaris Asena communication protocol [22]. The pumps were attached to a generic rack in a stacked fashion and a König & Meyer 19740 tablet clamp was used to hold the Android tablet in place.

A Windows laptop running a Java-based application was used to generate a quasi-randomized task order and display the current task.

In the central control condition, the Android tablet running a fully functional prototype of the central control interface was attached to the rack at shoulder height, facing the nurse (S1 Fig). In the conventional control condition, a Startech ICUSB2324X USB-to-RS232 converter was used to read all pump logs during the experiment.

In both conditions, the top pump was equipped with an empty syringe labeled as containing potassium chloride, the middle pump's syringe was labeled with insulin, and the bottom pump's syringe was labeled as containing propofol. Three other syringes with the same three labels were available for when a 'change syringe' task had to be performed.

### User interface

Development of the central control interface followed an iterative cycle where a design phase was alternated by review by ICU nurses. A think-aloud protocol (verbalization of thoughts)

was used during these reviews to uncover possible weaknesses in the design [23]. Development was considered complete when the reviewing nurses and the development team required no further changes to the user interface. In the main user interface, pumps are represented by a single row on screen (S1 Fig). Each row or pump contains essential information, such as drug names, administration rates and concentrations. Buttons for basic pump functionalities, such as start/stop, administration rate, bolus, volume to be infused (VTBI) and advanced settings were also visible in the user interface. The settings menu included an option to reset the administered volume, pump connection details and a log of user actions. Pump alarms were cached by the central control interface and were highlighted in white text on a semi-transparent red overlay on top of the affected pump.

A new functionality not present in the conventional control interface (i.e. the individual pump interfaces) was an advanced VTBI menu which helped calculate the required administration rate based on a target dose or volume, the concentration of the drug on the pump and a predefined timeframe (S2 Fig). A change syringe menu displayed a checklist of all required steps, which upon completion of the steps would automatically restart the pump when the new syringe was correctly placed in the pump (S3 Fig). Additionally, the bolus menu allowed to set a predefined bolus volume which could be administered without the need for holding the bolus button throughout the entire procedure.

## Participants

Eighteen nurses from an adult ICU participated in the experiment. Their mean  $\pm$  SD age was  $41 \pm 12$  years and their mean  $\pm$  SD ICU experience was  $12 \pm 12$  years. Participants were randomly assigned to either the central control or the conventional control condition first. There were no significant differences in age or work experience between the groups. All participants volunteered for the experiment and had not been exposed to the central control interface before. Ethical approval for this study was waived by our institutional review board (M17.214943). There were no patients involved in this study and data was collected anonymously.

## Experimental tasks

Participants performed several typical tasks related to intravenous therapy in a simulated ICU setting. Examples of such tasks were changing administration rates, replacing syringes, administering boluses and navigating through menus. A between-subject design was used where participants performed the experiment using either conventional pump control or the centralized control interface. Each participant performed a set of thirteen pump-related tasks. Some tasks could only be performed when another was finished. For example, the volume to be infused (VTBI) functionality could only be turned off after it had been set up in the first place. However, such interdependent tasks did not necessarily follow each other directly; any number of other tasks could be scheduled in between. An overview of all experimental assignments is displayed in Table 1. Step-by-step workflows of each task type are included in S1 File. Note that some task types occurred more often than others in the experiment (change rate; replace syringe, setup and stop VTBI) in order to reflect their frequency in the real-world ICU environment.

## Experimental procedure with the conventional and new central control interfaces

At the start of the experiment participants received a verbal explanation on all relevant functionalities of the user interface. Depending on the experimental condition either the central control interface or the conventional pump interface was explained. Participants had the opportunity to

**Table 1. Description of experimental assignments.**

| Task | Description                                                                                                                                                   | Type                  |
|------|---------------------------------------------------------------------------------------------------------------------------------------------------------------|-----------------------|
| 1    | Stop the propofol 2% pump.                                                                                                                                    | Stop pump             |
| 2    | Restart the propofol 2% pump and change the administration rate to 3.5 ml/h. Note: this task requires task 1 to be completed first.                           | Restart & change rate |
| 3    | Change the administration rate of the potassium chloride pump to 2.4 ml/h.                                                                                    | Change rate           |
| 4    | Change the administration rate of the potassium chloride pump to 3.0 ml/h.                                                                                    | Change rate           |
| 5    | Change the administration rate of the insulin pump to 1.4 ml/h.                                                                                               | Change rate           |
| 6    | Change the administration rate of the insulin pump to 0.8 ml/h.                                                                                               | Change rate           |
| 7    | Administer a bolus of 3 ml propofol 2% at a rate of 500 ml/h.                                                                                                 | Bolus                 |
| 8    | Replace the potassium chloride syringe and restart the pump.                                                                                                  | Replace syringe       |
| 9    | Replace the insulin syringe and restart the pump.                                                                                                             | Replace syringe       |
| 10   | Use the VTBI (volume to be infused) functionality to administer 3 mmol of potassium chloride using the current administration rate.                           | Setup VTBI            |
| 11   | Use the volume to be infused (VTBI) functionality to administer 4 international units (IU) of insulin in 30 minutes. Make sure the pump stops after infusion. | Setup VTBI            |
| 12   | Turn off the VTBI functionality on the potassium chloride pump, but make sure the pump keeps running. Note: this task requires task 10 to be completed first. | Stop VBTI             |
| 13   | Turn off the VTBI functionality on the insulin pump, but make sure the pump keeps running. Note: this task requires task 11 to be completed first.            | Stop VBTI             |

<https://doi.org/10.1371/journal.pone.0183104.t001>

try out each interface before the start of the experiment. Experimental assignments were displayed one by one on a laptop with an application that was programmed for this purpose. Every participant had to complete the same set of assignments, although the assignment order was quasi-randomized. Participants were instructed to read and perform the task belonging to each assignment. After completion of the assignment the participant could click a “next assignment” button that would display the next assignment until all thirteen assignments were completed. After the completion of the tasks, a usability questionnaire was administered.

The usability questionnaire consisted of 19 5-point Likert scale statements about the user interface that the participant operated during the experiment. Participants used the scale to rate their agreement from 1 (lowest level of agreement) to 5 (highest level of agreement). Statements covered the overall system appearance, user experience and user interaction as well as the ease of use during the experimental assignments.

### Data collection & analysis

All user actions were logged during the course of the experiment. In order to assess usability of each user interface as defined in the ISO 9241–11 standard, we measured task execution times and clicks to reflect efficiency. More clicks indicated that more effort was required to perform a task. We deduced errors from experimental logs as a measure of effectiveness, and administered a questionnaire to measure user satisfaction [20]. We defined an error as any unintended deviation from achieving the intended outcome of an action that could not be attributed to an external influence [24]. Statistical differences for execution times, clicks and errors between conditions were analyzed with Student’s *t*-tests. Statistical differences in ratings on individual questionnaire statements were analyzed using the Mann-Whitney *U* test, and the mean questionnaire rating was analyzed with the Student’s *t*-test. All statistical tests were performed using IBM SPSS Statistics 22.

### Results

Table 2 displays the mean execution times, clicks and total number of errors per assignment type. The overall mean execution time (conventional vs. central mean ± SD, 406±119 vs.

**Table 2. Execution times, clicks and errors per assignment type.**

| Assignment type    | Stop pump (task 1)    |                  | Restart & change rate (task 2) |                  | Change rate (task 3–6) |                  | Bolus (task 7)        |                  | Replace syringe (task 8 and 9) |                  | Setup VTBI (task 10 and 11) |                  | Cancel VTBI (task 12 and 13) |                  | Overall mean (task 1–13) |                  |
|--------------------|-----------------------|------------------|--------------------------------|------------------|------------------------|------------------|-----------------------|------------------|--------------------------------|------------------|-----------------------------|------------------|------------------------------|------------------|--------------------------|------------------|
|                    | Conventional<br>N = 9 | Central<br>N = 9 | Conventional<br>N = 9          | Central<br>N = 9 | Conventional<br>N = 9  | Central<br>N = 9 | Conventional<br>N = 9 | Central<br>N = 9 | Conventional<br>N = 9          | Central<br>N = 9 | Conventional<br>N = 8       | Central<br>N = 9 | Conventional<br>N = 8        | Central<br>N = 9 | Conventional<br>N = 9    | Central<br>N = 9 |
| Execution time (s) | 18 ± 16               | 19 ± 16          | 13 ± 6*                        | 26 ± 15*         | 27 ± 23                | 21 ± 10          | 79 ± 90               | 67 ± 25          | 20 ± 5**                       | 50 ± 19**        | 63 ± 15*                    | 46 ± 13*         | 22 ± 13                      | 17 ± 6           | 406 ± 119                | 421 ± 108        |
| Clicks             | 1.2 ± 0.7             | 1.0 ± 0.0        | 4.7 ± 3.5                      | 2.8 ± 0.7        | 7.0 ± 1.8**            | 2.1 ± 0.2**      | 2.8 ± 1.6*            | 4.9 ± 2.2*       | 3.4 ± 0.6**                    | 5.1 ± 0.9**      | 11.9 ± 4.5**                | 3.4 ± 0.5**      | 5.2 ± 3.2                    | 3.0 ± 0.5        | 73 ± 20**                | 40 ± 3**         |
| Errors             | 0.2 ± 0.6             | 0.0 ± 0.0        | 0.1 ± 0.3                      | 0.0 ± 0.0        | 0.1 ± 0.2              | 0.0 ± 0.0        | 0.1 ± 0.3             | 0.3 ± 0.5        | 0.0 ± 0.0                      | 0.1 ± 0.2        | 0.7 ± 0.5*                  | 0.2 ± 0.4*       | 0.4 ± 0.5*                   | 0.0 ± 0.0*       | 2.9 ± 2.3*               | 0.9 ± 1.0*       |

Data are expressed as mean ± standard deviation.

For errors, totals per category are displayed.

\* = p < 0.05.

\*\* = p < 0.001.

<https://doi.org/10.1371/journal.pone.0183104.t002>

421±108 seconds, not significant) did not differ between interfaces, whereas the overall mean number of clicks was lower using the central control interface (73±20 vs. 40±3 clicks,  $p < 0.001$ ). Overall fewer errors were made using the central control interface (2.9±2.3 vs. 0.9±1.0 errors,  $p < 0.05$ ). A description of all recorded errors is available in Table 1 in [S1 File](#).

Median ratings on questionnaire statements and Mann-Whitney  $U$  test results can be found in Table 2 in [S1 File](#). Ratings on statements regarding the aesthetics, clarity, intuitiveness and ease to discriminate between pumps with a user interface (statements 2–5) differed significantly between conditions in favor of the central control interface. The mean ± SD rating calculated over all questionnaire statements was higher for the central control interface than the conventional interface (4.6±0.3 vs. 4.1±0.5,  $p = 0.03$ ).

## Discussion

We investigated whether a new central control interface would improve the overall usability of infusion pump control in a multi-infusion setting. Task-based usability analysis indicated that both objectively and subjectively the central control interface improved usability. Means calculated over all assignments indicated that participants required fewer clicks to perform the experimental tasks in the central control condition and also made fewer errors, indicating a more efficient and effective interaction. Questionnaires indicated that participants preferred the central control interface over the conventional interface, indicating greater user satisfaction.

There was no overall difference in execution times. This is remarkable since all participants were expert users of the conventional interface and had no prior experience with the central control interface. Moreover, it is likely that with further training the central control interface will outperform the conventional interface in terms of task execution times [25]. Data on specific execution times revealed that participants were able to change syringes 30 seconds faster on average using conventional pumps than using the central control interface. A difference between the two conditions is that the central control interface automatically stops and restarts the pump when a new syringe is placed. Although this feature was intended to improve the workflow, a relatively slow data connection between the central control interface and the infusion pumps limited the number of pump control commands to roughly 1 command per second. Hence, the pump's RS232 communication layer was slowing down the task. As the communication protocol for the infusion pumps did not allow the automated confirmation of the syringe, the syringes had to be confirmed by manually pressing the confirm button on the pump instead of on the central control interface, which also impaired workflow. In case of a follow up of this study, a low latency communication layer between the pumps and interface will be required to optimize the task of replacing syringes.

In setting up a volume to be infused (VTBI) infusion on the pump participants were faster in the central control condition. The central control interface automatically calculated the required administration rate based on a preconfigured drug concentration, a target dose or volume and a predefined timeframe. In the conventional condition, the pumps offered no calculation support in the VTBI menu. Therefore, participants had to calculate which rate was required, which is a slow and error-prone task. Roughly half of the participants indicated that they did not regularly use the VTBI menu in the conventional interface, which may also explain that significantly more errors occurred during the VTBI tasks using the conventional interface. The difference in overall error rate appears to be mostly driven by errors in the VTBI tasks. The participants mentioned that the menu structure of the conventional interface was too complicated for the VTBI tasks. We believe this illustrates how counterintuitive design choices for the VTBI menu have contributed to poor usability and the occurrence of errors.

This issue may be specific to the brand and model of infusion pump used in this study. A revision of the workflow of this particular VTBI menu should be considered if this proves to be an issue in real hospital environments as well.

In this study we compared the usability of a newly developed central control interface to that of a conventional pump setup. The results of this study indicate that this central control interface has a better overall usability than the conventional interface. However, this does not imply that central control in general will have a better usability than a conventional setup of individual pumps. In order to test for such a difference the layout and workflow of the central control interface should mimic that of the separate pumps. Such a setup will have very limited added value for a central control interface as it does not add any new features to the system as a whole. Added value may be gained by implementing sophisticated multi-pump profiles, for example, a system that switches from one pump to another when a syringe is almost empty or more complex multi-drug profiles (e.g. oncology treatment) [26]. Another extension could be early detection of IV line occlusions using combined pressure sensor readings from multiple pumps, which may reduce alarm fatigue by reducing the number of false alarms [27]. We believe that a well-designed central interface is complementary to a set of well-designed individual infusion pumps in a multi-infusion setting.

As a future extension of this study we propose testing with larger number of participants as well as ensuring a low-latency connection with the pumps. Testing with nurses who are not familiar with the conventional interface may reveal performance differences in other tasks than just the VTBI tasks. Including a longer training period with the central control interface may reveal differences in execution times as well. Although the current study did not focus on alarms, a future challenge for central pump control will be the channeling of alarm signals as existing visual and audible cues will remain important for the swift localization of the affected pump.

## Conclusion

In this proof of concept study, we have shown how the usability of infusion pumps can affect the occurrence of errors related to intravenous therapy. A user-friendly user interface to control and monitor multiple infusion pumps was developed and its usability was compared to that of the current method of manually operating multiple infusion pumps in a task-based usability analysis. Results suggest that the centralized control system has an overall better usability and reduces the number of errors.

## Supporting information

### **S1 Fig. The user interface in the central control condition.**

(TIF)

**S2 Fig. Dialog of the volume to be infused menu of the central user interface.** An infusion rate can be automatically calculated based on a desired volume and time window to avoid calculation errors.

(TIF)

**S3 Fig. Change syringe dialog.** The change syringe dialog in the central user interface allows the user to check subtasks when they are done. The system communicates with the pump in the background to verify completion of these subtasks and will automatically restart the infusion in that case.

(TIF)

**S1 File. Supplementary material.**  
(DOCX)

**S1 Dataset. Experimental data per category.**  
(SAV)

**S2 Dataset. Experimental data.**  
(SAV)

**S3 Dataset. Questionnaire data.**  
(SAV)

## Author Contributions

**Conceptualization:** Frank Doesburg, Fokie Cnossen, Willem Dieperink, Wouter Bult, Anne Marie de Smet, Daan J. Touw, Maarten W. Nijsten.

**Data curation:** Frank Doesburg, Fokie Cnossen, Maarten W. Nijsten.

**Formal analysis:** Frank Doesburg, Fokie Cnossen, Maarten W. Nijsten.

**Funding acquisition:** Frank Doesburg, Maarten W. Nijsten.

**Investigation:** Frank Doesburg.

**Methodology:** Frank Doesburg, Fokie Cnossen, Willem Dieperink, Wouter Bult, Anne Marie de Smet, Daan J. Touw, Maarten W. Nijsten.

**Project administration:** Frank Doesburg, Willem Dieperink, Daan J. Touw, Maarten W. Nijsten.

**Resources:** Frank Doesburg, Willem Dieperink, Wouter Bult, Maarten W. Nijsten.

**Software:** Frank Doesburg.

**Supervision:** Anne Marie de Smet, Daan J. Touw, Maarten W. Nijsten.

**Validation:** Frank Doesburg, Fokie Cnossen, Willem Dieperink, Wouter Bult, Anne Marie de Smet, Daan J. Touw, Maarten W. Nijsten.

**Visualization:** Frank Doesburg, Fokie Cnossen, Wouter Bult, Maarten W. Nijsten.

**Writing – original draft:** Frank Doesburg, Fokie Cnossen, Willem Dieperink, Wouter Bult, Anne Marie de Smet, Daan J. Touw, Maarten W. Nijsten.

**Writing – review & editing:** Frank Doesburg, Fokie Cnossen, Willem Dieperink, Wouter Bult, Anne Marie de Smet, Daan J. Touw, Maarten W. Nijsten.

## References

1. Garmer K, Lijegren E, Osvalder A-L, Dahlman S. Application of usability testing to the development of medical equipment. Usability testing of a frequently used infusion pump and a new user interface for an infusion pump developed with a Human Factors approach. *Int J Ind Ergon* [Internet]. 2002 Mar; 29(3):145–59. Available from: <http://linkinghub.elsevier.com/retrieve/pii/S0169814101000609>
2. Gosbee JW. Conclusion: You need human factors engineering expertise to see design hazards that are hiding in “plain sight!”. *Respir Care* [Internet]. 2004 Dec; 30(12):696–700. Available from: <http://www.ncbi.nlm.nih.gov/pubmed/15646103>
3. Ward JR, Clarkson PJ. An analysis of medical device-related errors: prevalence and possible solutions. *J Med Eng Technol* [Internet]. 2004 [cited 2013 Jul 24]; 28(1):2–21. Available from: <http://www.ncbi.nlm.nih.gov/pubmed/14660181> <https://doi.org/10.1080/0309190031000123747> PMID: 14660181



4. Liljegren E, Osvalder a.-L, Dahlman S. Setting the Requirements for a User-Friendly Infusion Pump. *Proc Hum Factors Ergon Soc Annu Meet* [Internet]. 2000 Jul 1 [cited 2012 Jun 18]; 44(1):132–5. Available from: <http://pro.sagepub.com/lookup/doi/10.1177/154193120004400135>
5. Husch M, Sullivan C, Rooney D, Barnard C, Fotis M, Clarke J, et al. Insights from the sharp end of intravenous medication errors: implications for infusion pump technology. *Qual Saf Health Care* [Internet]. 2005 Apr [cited 2013 Aug 27]; 14(2):80–6. Available from: <http://www.pubmedcentral.nih.gov/articlerender.fcgi?artid=1743987&tool=pmcentrez&rendertype=abstract> <https://doi.org/10.1136/qshc.2004.011957> PMID: 15805451
6. Gagnon R, Laberge J, Lamsdale a., Histon J, Hudson C, Davies J, et al. A User-Centered Evaluation of three Intravenous Infusion Pumps. *Proc Hum Factors Ergon Soc Annu Meet* [Internet]. 2004 Sep 1; 48(15):1773–7. Available from: <http://pro.sagepub.com/lookup/doi/10.1177/154193120404801531>
7. Graham MJ, Kubose TK, Jordan D, Zhang J, Johnson TR, Patel VL. Heuristic evaluation of infusion pumps: implications for patient safety in Intensive Care Units. *Int J Med Inform* [Internet]. 2004 Nov [cited 2012 Apr 18]; 73(11–12):771–9. Available from: <http://www.ncbi.nlm.nih.gov/pubmed/15491928> <https://doi.org/10.1016/j.ijmedinf.2004.08.002> PMID: 15491928
8. Vijayakumar A, Sharon E V, Teena J, Nabil S, Nazeer I. A clinical study on drug-related problems associated with intravenous drug administration. *J Basic Clin Pharm* [Internet]. 2014 Mar [cited 2014 Sep 24]; 5(2):49–53. Available from: <http://www.pubmedcentral.nih.gov/articlerender.fcgi?artid=4074696&tool=pmcentrez&rendertype=abstract> <https://doi.org/10.4103/0976-0105.134984> PMID: 25031500
9. Zhang J, Johnson TR, Patel VL, Paige DL, Kubose T. Using usability heuristics to evaluate patient safety of medical devices. *J Biomed Inform* [Internet]. 2003 Feb [cited 2012 Mar 1]; 36(1–2):23–30. Available from: <http://linkinghub.elsevier.com/retrieve/pii/S1532046403000601> PMID: 14552844
10. Ginsburg G. Human factors engineering: a tool for medical device evaluation in hospital procurement decision-making. *J Biomed Inform* [Internet]. 2005 Jun [cited 2012 Apr 18]; 38(3):213–9. Available from: <http://www.ncbi.nlm.nih.gov/pubmed/15896694> <https://doi.org/10.1016/j.jbi.2004.11.008> PMID: 15896694
11. Kalisch BJ, Aebersold M. Interruptions and multitasking in nursing care. *Jt Comm J Qual Patient Saf* [Internet]. 2010 Mar; 36(3):126–32. Available from: <http://www.ncbi.nlm.nih.gov/pubmed/20235414> PMID: 20235414
12. Laxmisan A, Hakimzada F, Sayan OR, Green R a, Zhang J, Patel VL. The multitasking clinician: decision-making and cognitive demand during and after team handoffs in emergency care. *Int J Med Inform* [Internet]. 2006 [cited 2013 Aug 24]; 76(11–12):801–11. Available from: <http://www.ncbi.nlm.nih.gov/pubmed/17059892> <https://doi.org/10.1016/j.ijmedinf.2006.09.019> PMID: 17059892
13. Syroid N, Liu D, Albert R, Agutter J, Egan TD, Pace NL, et al. Graphical user interface simplifies infusion pump programming and enhances the ability to detect pump-related faults. *Anesth Analg* [Internet]. 2012 Nov; 115(5):1087–97. Available from: <http://content.wkhealth.com/linkback/openurl?sid=WKPTLP:landingpage&an=00000539-201211000-00015> <https://doi.org/10.1213/ANE.0b013e31826b46bc> PMID: 23011557
14. Elias BL, Moss JA, Shih A, Dillavou M. Development of a simulated smart pump interface. *Comput Inform Nurs* [Internet]. 2014 Jan; 32(1):21–7-9. Available from: <http://www.ncbi.nlm.nih.gov/pubmed/24189715> <https://doi.org/10.1097/CIN.000000000000016> PMID: 24189715
15. Garmer K, Liljegren E, Osvalder a.-L, Dahlman S. Usability Evaluation of a New User Interface for an Infusion Pump Developed with a Human Factors Approach. *Proc Hum Factors Ergon Soc Annu Meet* [Internet]. 2000 Jul 1 [cited 2012 Jun 18]; 44(1):128–31. Available from: <http://pro.sagepub.com/lookup/doi/10.1177/154193120004400134>
16. Moyen E, Camiré E, Stelfox HT. Clinical review: medication errors in critical care. *Crit Care* [Internet]. 2008 Jan [cited 2013 Jun 8]; 12(2):208. Available from: <http://www.pubmedcentral.nih.gov/articlerender.fcgi?artid=2447555&tool=pmcentrez&rendertype=abstract> <https://doi.org/10.1186/cc6813> PMID: 18373883
17. Rothschild JM, Landrigan CP, Cronin JW, Kaushal R, Lockley SW, Burdick E, et al. The Critical Care Safety Study: The incidence and nature of adverse events and serious medical errors in intensive care\*. *Crit Care Med* [Internet]. 2005 Aug [cited 2013 Aug 9]; 33(8):1694–700. Available from: <http://content.wkhealth.com/linkback/openurl?sid=WKPTLP:landingpage&an=00003246-200508000-00003> PMID: 16096443
18. Doesburg F. University of Groningen Master thesis: Developing a System for Integrated Automated Control of Multiple Infusion Pumps. University of Groningen; 2013.
19. Giraud T, Dhainaut JF, Vaxelaire JF, Joseph T, Journois D, Bleichner G, et al. Iatrogenic complications in adult intensive care units: a prospective two-center study. *Crit Care Med*. 1993; 21:40–51. PMID: 8420729

20. International Organization for Standardization. Ergonomic requirements for office work with visual display terminals (VDTs) Part 11 Guidance on usability. Geneva; 1998. p. 9241–11.
21. Free Software Foundation. GNU General Public License Version 2.1 [Internet]. 1999 [cited 2017 Jun 28]. Available from: <http://www.gnu.org/licenses/old-licenses/lgpl-2.1.html>
22. Richardson M, Templeton P, Fry T. Alaris® Syringe Pump Communications Protocol. 2006.
23. Ericsson KA, Simon HA. Verbal reports as data. *Psychol Rev.* 1980; 87(3).
24. Reason J. *Human Error*. New York, NY: Cambridge University Press; 1990. 302 p.
25. Yelle LE. The Learning Curve: Historical Review and Comprehensive Survey. *Decis Sci [Internet]*. 1979 Apr; 10(2):302–28. Available from: <http://doi.wiley.com/10.1111/j.1540-5915.1979.tb00026.x>
26. Cour M, Hernu R, Bénét T, Robert JM, Regad D, Chabert B, et al. Benefits of smart pumps for automated changeovers of vasoactive drug infusion pumps: a quasi-experimental study. *Br J Anaesth [Internet]*. 2013 Nov; 111(5):818–24. Available from: <http://www.ncbi.nlm.nih.gov/pubmed/23761221> <https://doi.org/10.1093/bja/aet199> PMID: 23761221
27. Sendelbach S, Funk M. Alarm fatigue: a patient safety concern. *AACN Adv Crit Care [Internet]*. 24(4):378–86-8. Available from: <http://www.ncbi.nlm.nih.gov/pubmed/24153215> <https://doi.org/10.1097/NCI.0b013e3182a903f9> PMID: 24153215
